# Supplementary material for: One-step solvothermal synthesis of highly water-soluble, negatively charged superparamagnetic Fe3O4 colloidal nanocrystal clusters
Source: Royal Society of Chemistry journal article supplement (doi:10.1039/c3nr00931a), 2013-01-01
Supplement: c3nr00931a.pdf [file c3nr00931a.pdf]

## Supplementary Information

# One-step Solvothermal Synthesis of Highly Water-soluble, Negatively Charged Superparamagnetic Fe<sub>3</sub>O<sub>4</sub> Colloidal Nanocrystal Clusters

Jining Gao, Xinze Ran, Chunmeng Shi\*, Humin Cheng, Tianmin Cheng and  
Yongping Su\*

Institute of Combined Injury, State Key Laboratory of Trauma, Burns and Combined  
Injury, Chongqing Engineering Research Center for Nanomedicine, College of  
Preventive Medicine, Third Military Medical University, 30 Gaotanyan Road, 400038,  
Chongqing, China. Fax: +86-23-68752009; Tel: +86-23-68752279

E-mail: [syp2003@163.com](mailto:syp2003@163.com), [shicm@sina.com](mailto:shicm@sina.com)

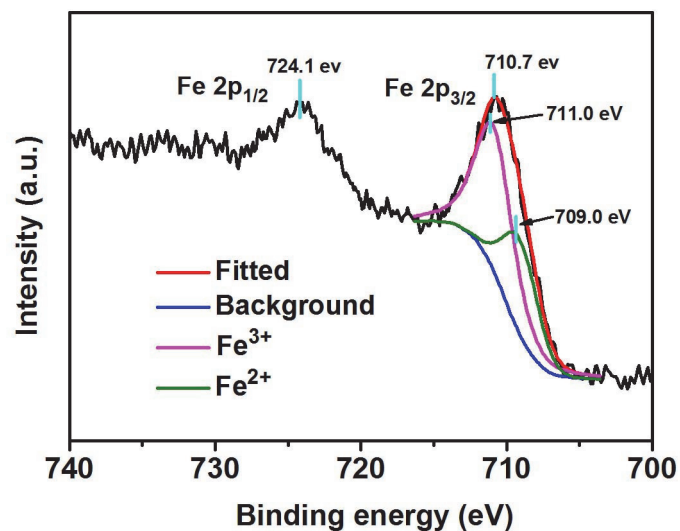

**Fig.S1** XPS spectrum of the fitted Fe 2p<sub>2/3</sub> peak from the products. The Fe 2p<sub>2/3</sub> peak for Fe<sub>3</sub>O<sub>4</sub> was deconvoluted into two peaks by using the peak positions of Fe<sup>2+</sup> at 709.0 eV and Fe<sup>3+</sup> at 711.0 eV. The relative areas of the deconvoluted peak assigned to Fe<sup>2+</sup> and Fe<sup>3+</sup> were calculated to be 0.35:0.65; this value is clearly that of the stoichiometric of Fe<sub>3</sub>O<sub>4</sub> within the uncertainty of calculations. Since Fe<sub>3</sub>O<sub>4</sub> could also be expressed to be FeO·Fe<sub>2</sub>O<sub>3</sub>, the Fe<sup>2+</sup>:Fe<sup>3+</sup> ratio should be 1:2 or 0.33:0.67.

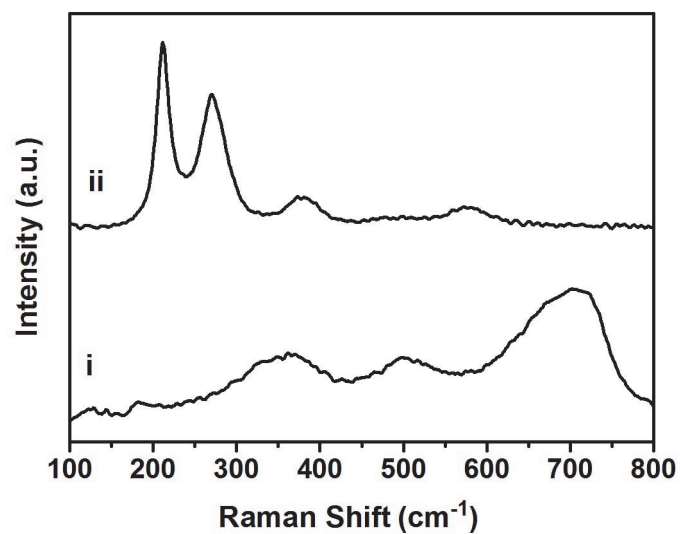

**Fig.S2** Raman scattering spectra of the product synthesized with 0.5 g of PSSMA (3:1) obtained with different laser power (i) 0.1 mW and (ii) 1.0 mW. These two spectra were assigned to  $\text{Fe}_3\text{O}_4$  (i) and  $\alpha\text{-Fe}_2\text{O}_3$  (ii), respectively. When the laser power was increased, the transformation from magnetite ( $\text{Fe}_3\text{O}_4$ ) to hematite ( $\alpha\text{-Fe}_2\text{O}_3$ ) was observed due to the local heating induced oxidation from laser irradiation; this phenomenon was in accordance with that reported in reference 36 and 37.

**Table S1** Synthesis condition, corresponding hydrodynamic size and primary nanocrystal size of the MCNCs.

| No.       | FeCl <sub>3</sub> ·6H <sub>2</sub> O<br>(g) | Solvent (mL) |     | PSSMA (g)<br>(SS:MA) | Time<br>(h) | Z-Average<br>Diameter (nm) | PDI           | Primary<br>Nanocrystal<br>Size (nm) |
|-----------|---------------------------------------------|--------------|-----|----------------------|-------------|----------------------------|---------------|-------------------------------------|
|           |                                             | EG           | DEG |                      |             |                            |               |                                     |
| <b>1</b>  | 0.54                                        | 20           | 0   | 0                    | 10          | 360.0 ± 20.7               | 0.238 ± 0.009 | 15.3                                |
| <b>2</b>  | 0.54                                        | 20           | 0   | 0.1 (3:1)            | 10          | 259.8 ± 2.7                | 0.156 ± 0.018 | 8.3                                 |
| <b>3</b>  | 0.54                                        | 20           | 0   | 0.5 (3:1)            | 10          | 231.3 ± 2.5                | 0.027 ± 0.007 | 7.4                                 |
| <b>4</b>  | 0.54                                        | 20           | 0   | 1.0 (3:1)            | 10          | 220.5 ± 0.9                | 0.025 ± 0.017 | 6.6                                 |
| <b>5</b>  | 0.27                                        | 20           | 0   | 0.5 (3:1)            | 10          | 371.5 ± 8.0                | 0.238 ± 0.011 | 9.0                                 |
| <b>6</b>  | 1.08                                        | 20           | 0   | 0.5 (3:1)            | 10          | 239.9 ± 1.4                | 0.059 ± 0.006 | 7.0                                 |
| <b>7</b>  | 0.54                                        | 20           | 0   | 0.5 (3:1)            | 5           | 217.6 ± 1.9                | 0.038 ± 0.015 | 6.5                                 |
| <b>8</b>  | 0.54                                        | 20           | 0   | 0.5 (3:1)            | 20          | 260.8 ± 1.6                | 0.053 ± 0.037 | 7.7                                 |
| <b>9</b>  | 0.54                                        | 20           | 0   | 0.5 (1:1)            | 10          | 198.9 ± 1.2                | 0.031 ± 0.003 | 6.3                                 |
| <b>10</b> | 0.54                                        | 10           | 10  | 0.5 (3:1)            | 10          | 247.1 ± 1.5                | 0.029 ± 0.013 | 7.5                                 |
| <b>11</b> | 0.54                                        | 10           | 10  | 0.5 (1:1)            | 10          | 214.8 ± 2.6                | 0.037 ± 0.024 | 6.7                                 |

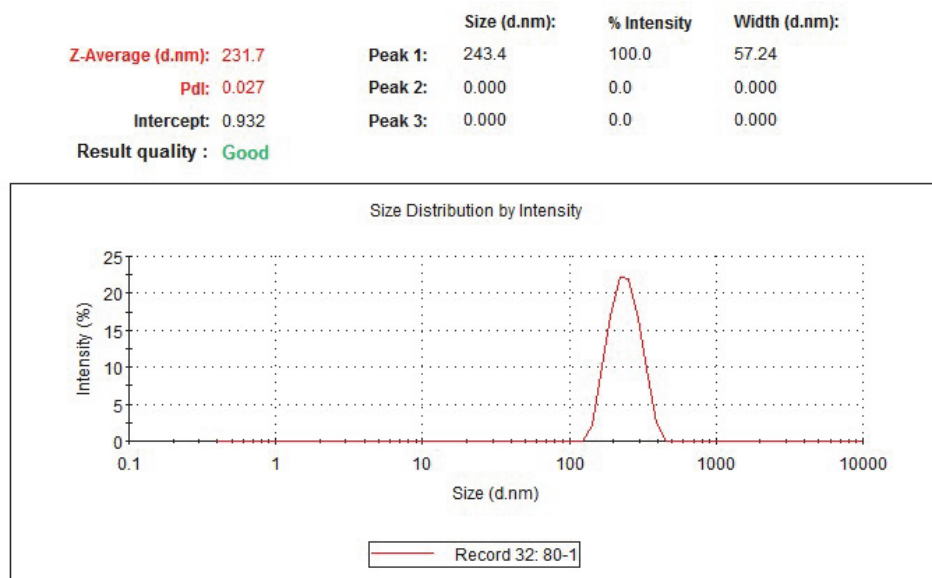

**Fig. S3** A typical intensity particle size distribution for Fe<sub>3</sub>O<sub>4</sub> MCNCs synthesized with 0.5 g of PSSMA (3:1) (Sample 3 in Table S1).

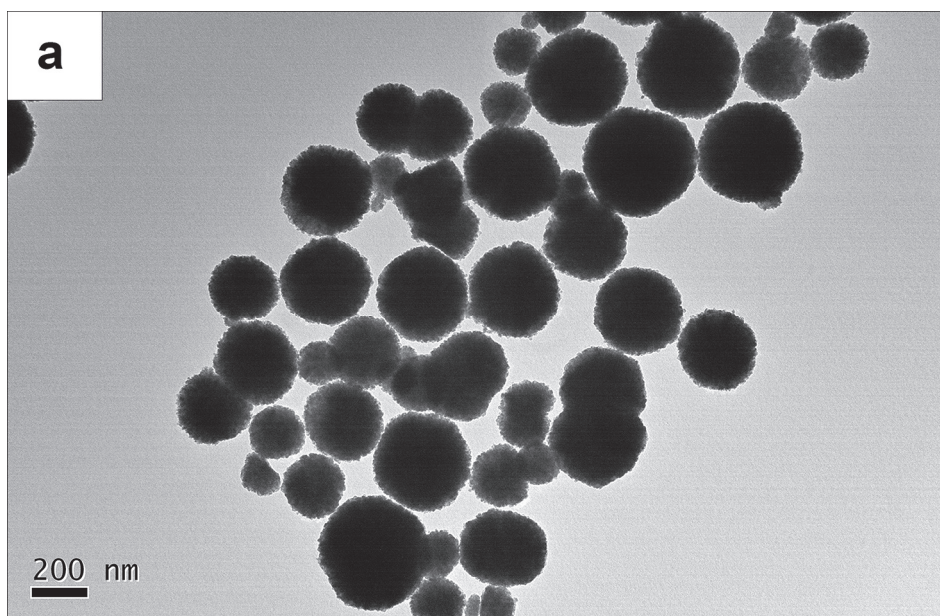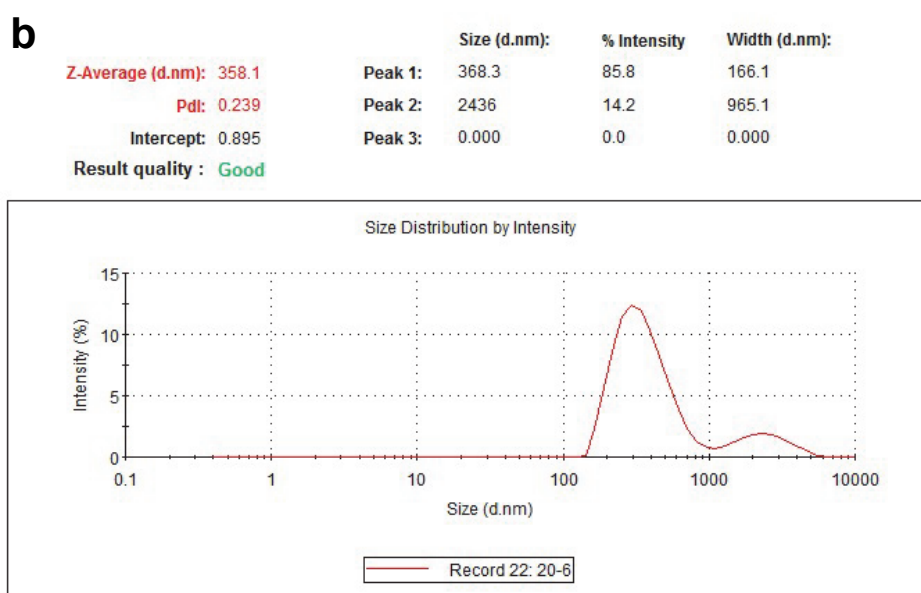

**Fig. S4** A typical TEM image (a) and intensity particle size distribution (b) for Fe<sub>3</sub>O<sub>4</sub> MCNCs synthesized without PSSMA (Sample 1 in Table S1).

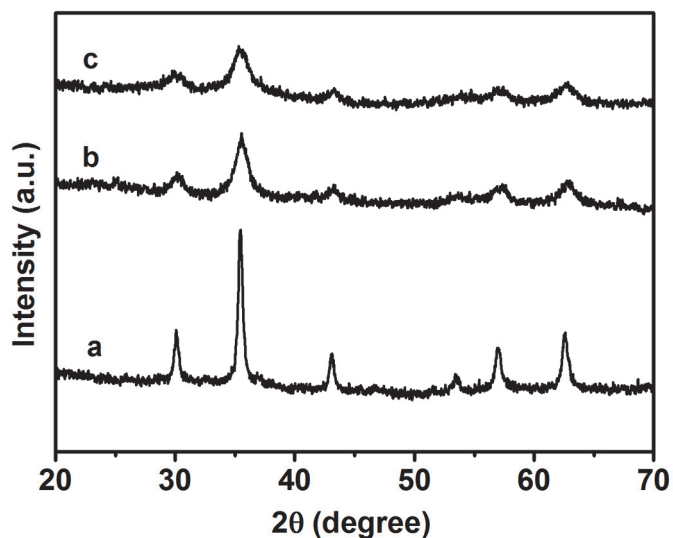

**Fig. S5** XRD patterns of the  $\text{Fe}_3\text{O}_4$  MCNCs obtained using different PSSMA: (a) no PSSMA, (b) 0.5 g PSSMA (3:1), and (c) 0.5 g PSSMA (1:1). (See also sample No.1, No.3, and No.9 in Table S1, respectively).

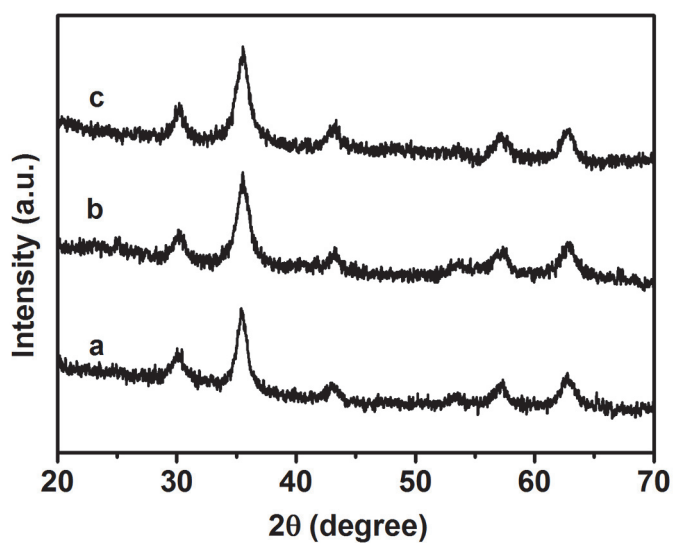

**Fig. S6** XRD patterns of the  $\text{Fe}_3\text{O}_4$  MCNCs obtained using different amounts of  $\text{FeCl}_3 \cdot 6\text{H}_2\text{O}$ : (a) 0.27, (b) 0.54, and (c) 1.08 g, (See also sample No.3, No.5, and No.6 in Table S1, respectively).

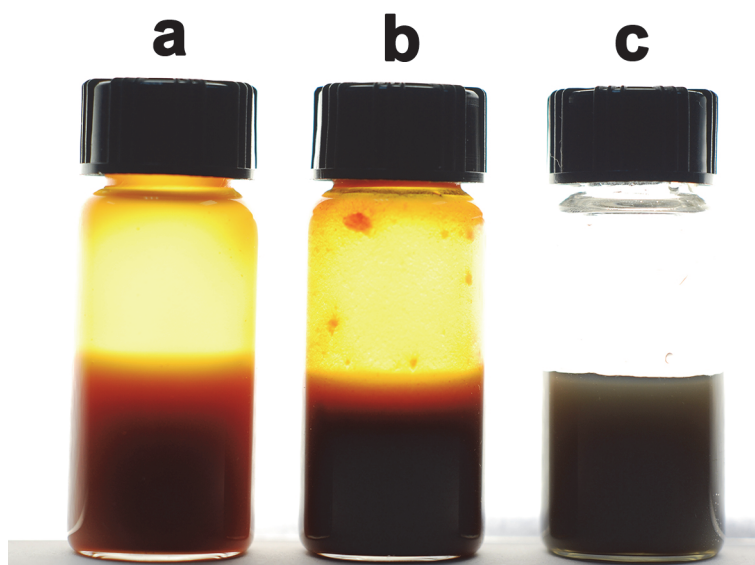

**Fig. S7** Digital photographs of the reaction mixtures with the reaction time of (a) 1 h, (b) 3 h, (c) 10 h.



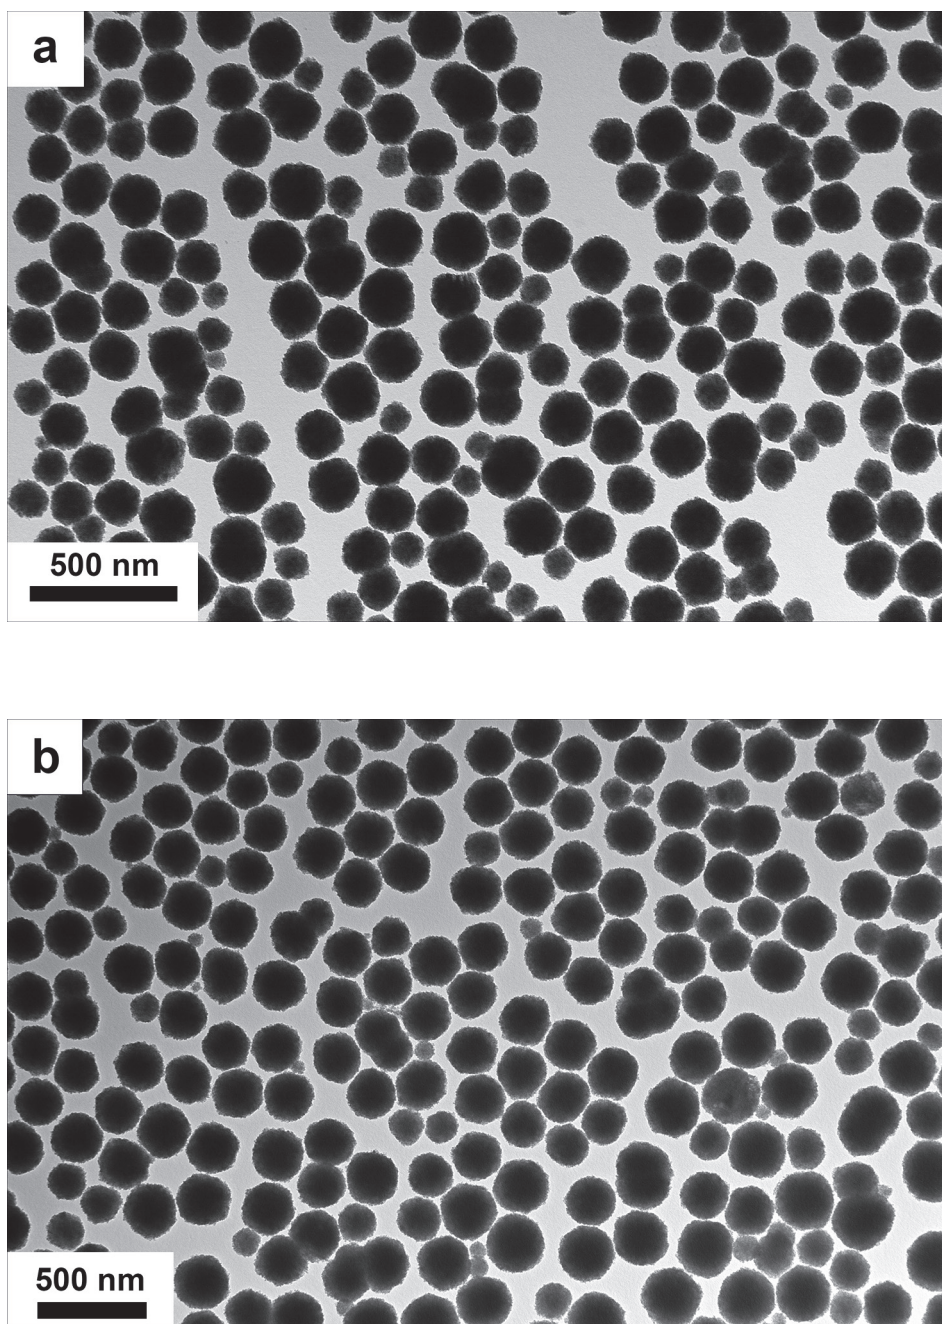

**Fig. S8** TEM images of Fe<sub>3</sub>O<sub>4</sub> MCNCs synthesized with 0.5 g PSSMA (3:1) with the reaction time of (a) 5 h, (b) 20 h.

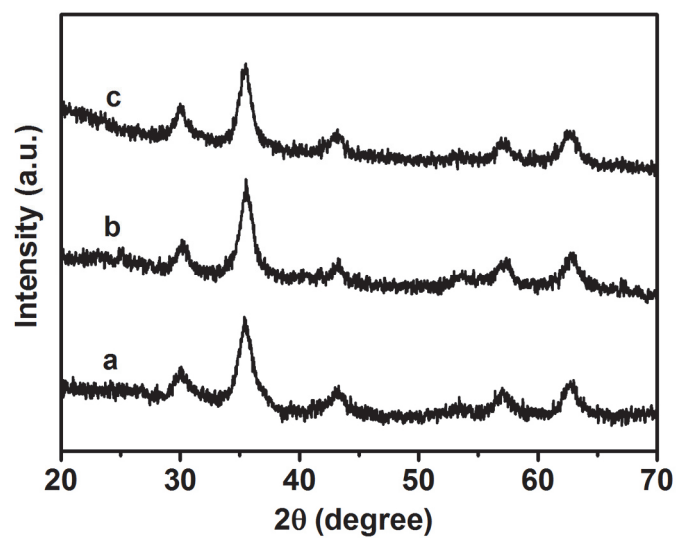

**Fig. S9** XRD patterns of the Fe<sub>3</sub>O<sub>4</sub> MCNCs obtained with different reaction time: (a) 5, (b) 10, and (c) 20 h. (See also sample No.7, No.3, and No.8 in Table S1, respectively).

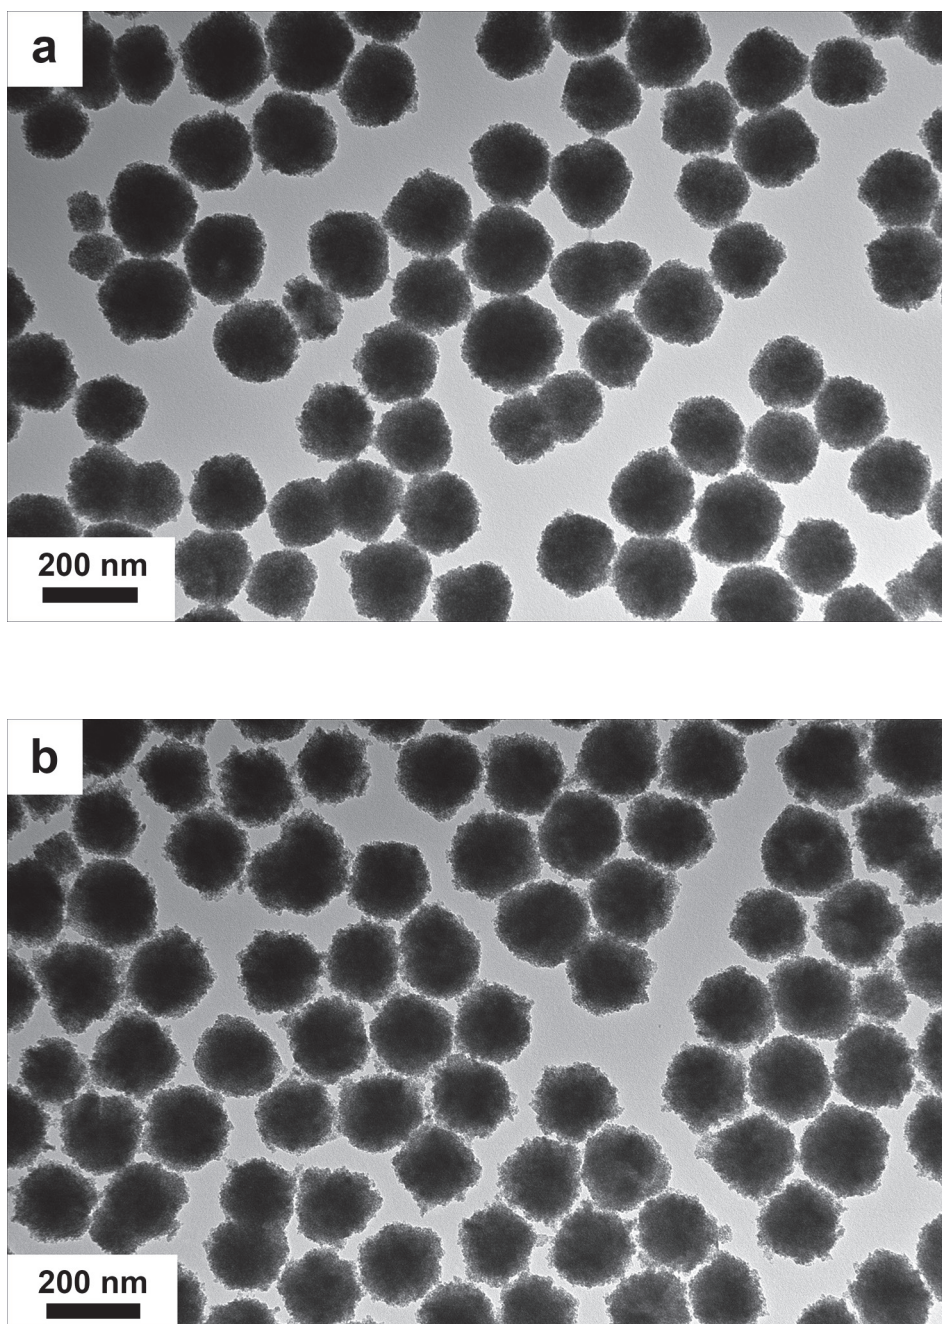

**Fig. S10** TEM images of Fe<sub>3</sub>O<sub>4</sub> MCNCs synthesized in solvent mixtures with EG/DEG ratio (v/v) of 10/10 using 0.5 g of (a) PSSMA 3:1 and (b) PSSMA 1:1.

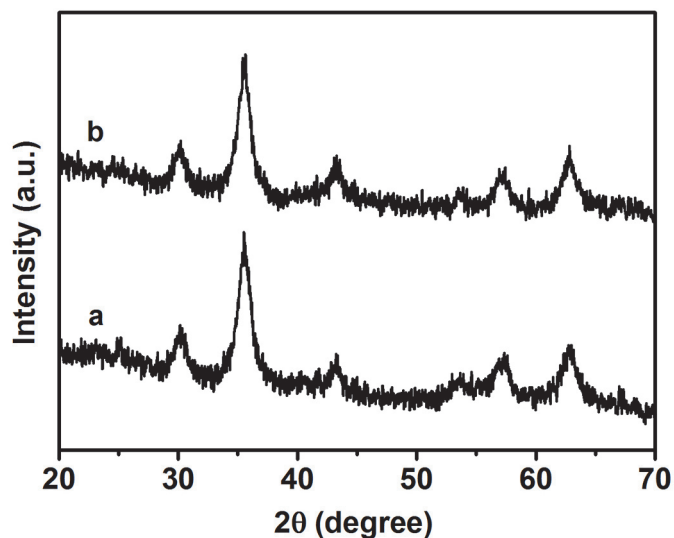

**Fig. S11** XRD patterns of the  $\text{Fe}_3\text{O}_4$  MCNCs obtained using different solvent composition in the presence of 0.5 g PSSMA (3:1): (a) 20 mL EG, (b) 10 mL EG and 10 mL DEG. (See also sample No.3, No.10 in Table S1, respectively).

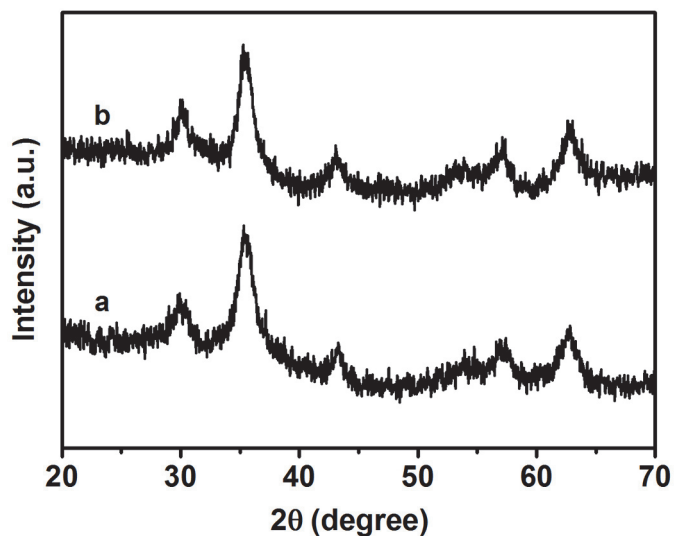

**Fig. S12** XRD patterns of the  $\text{Fe}_3\text{O}_4$  MCNCs obtained using different solvent composition in the presence of 0.5 g PSSMA (1:1): (a) 20 mL EG, (b) 10 mL EG and 10 mL DEG. (See also sample No.9, and No.11 in Table S1, respectively).

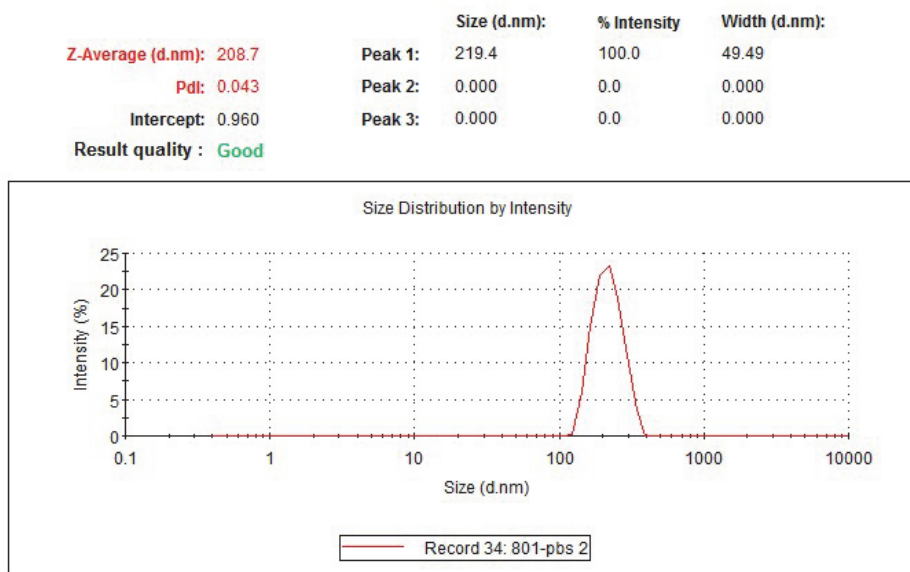

**Fig. S13** A typical intensity particle size distribution for Fe<sub>3</sub>O<sub>4</sub> MCNCs dispersed in PBS.

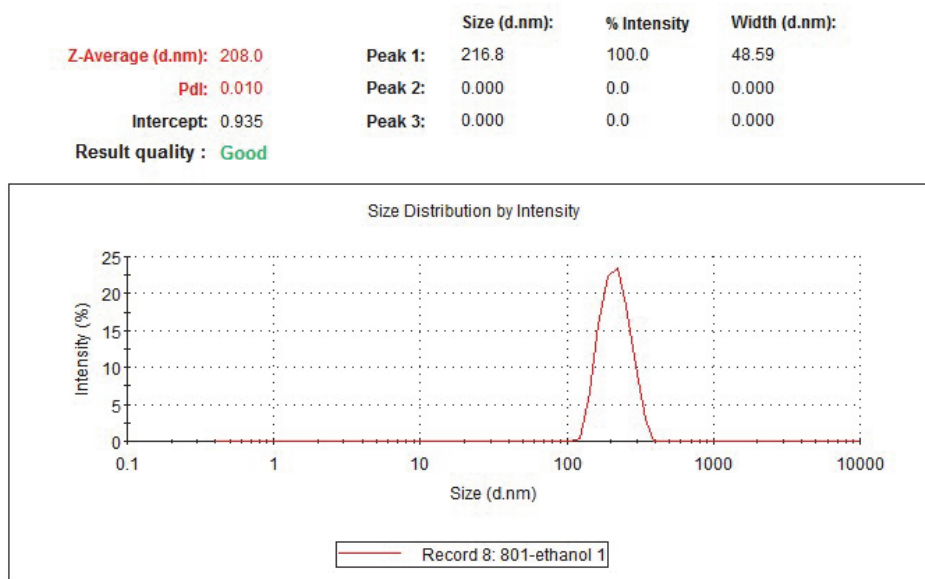

**Fig. S14** A typical intensity particle size distribution for Fe<sub>3</sub>O<sub>4</sub> MCNCs dispersed in ethanol.

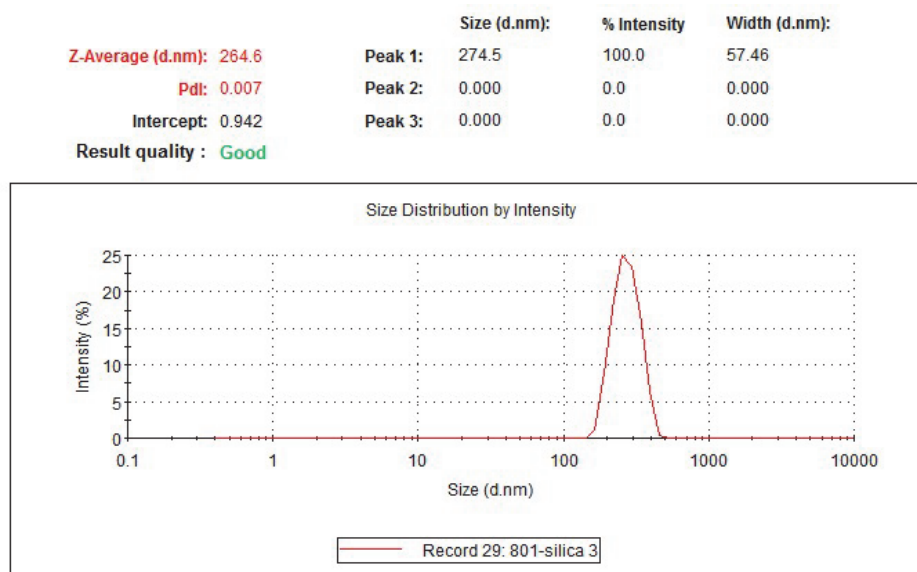

**Fig. S15** A typical intensity particle size distribution for silica coated  $\text{Fe}_3\text{O}_4$  MCNCs dispersed in water.
